# Supplementary material for: Bio-Efficacy of Chrysoeriol7, a Natural Chemical and Repellent, against Brown Planthopper in Rice
Source: MDPI journal article supplement (doi:10.3390/ijms23031540), 2022-01-28
Supplement: s1 [file s1]

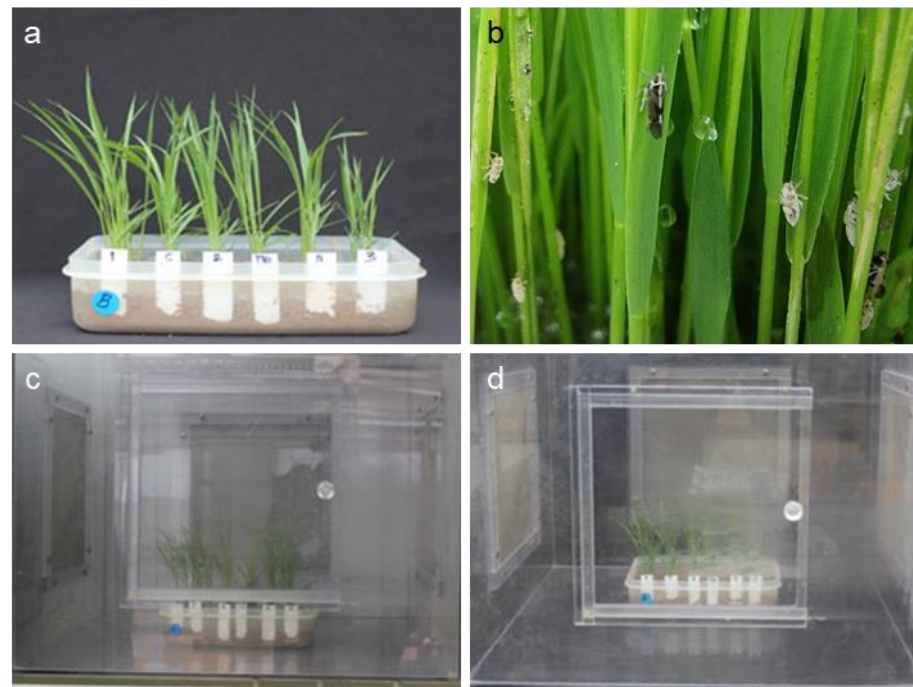

**Figure S1.** BPH rearing for the BPH infection to rice. **(a)** Plant materials. BPH-resistant population: Samgang, SNDH29, and SNDH30. BPH-susceptible population: Nagdong, TN1, and SNDH11. **(b)** BPH is reared in the cage for the BPH infection in each population. **(c)** Control group. **(d)** Experiment group. After BPH infection at the seedling stage was sampled for 1 day, 2 days, and 3 days.
